# Supplementary material
Source: Springer Nature journal article supplement (https://www.springermedizin.de/resource/supplementary/12967_2008_319_MOESM4_ESM.pdf/9576368)

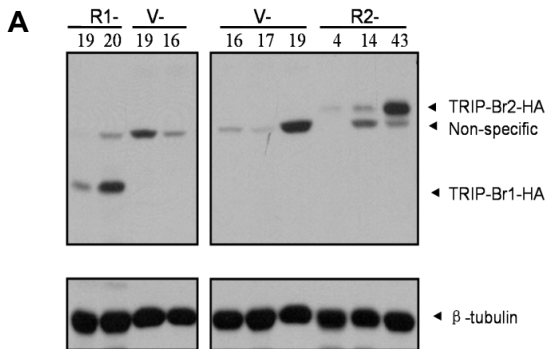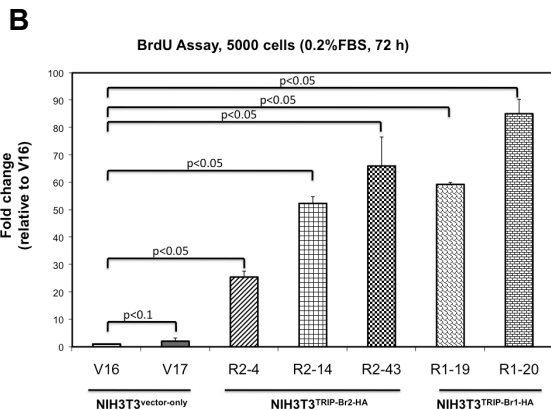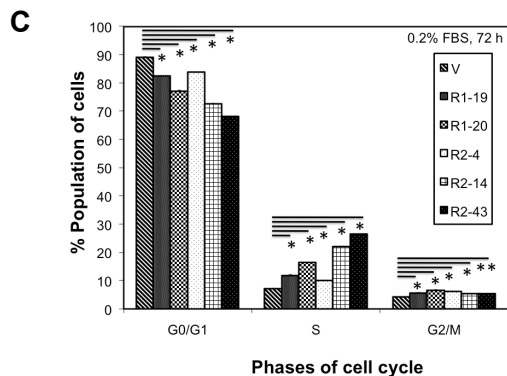

Phases of cell cycle

**D** Semi-qRT-PCR (Serum deprivation)

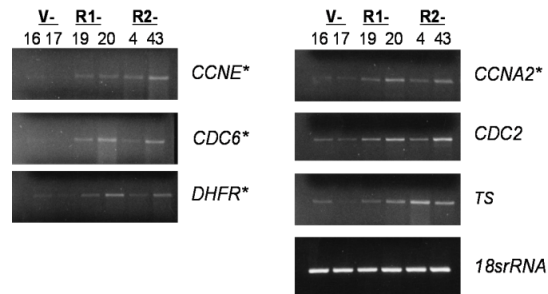

Western Blot (Serum deprivation)

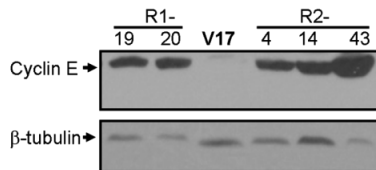

Supplement: MOESM4 [file 9576368]
